# Supplementary material for: Epidemiology, Genetic Characterization, and Pathogenesis of Avian Influenza H5N8 Viruses Circulating in Northern and Southern Parts of Egypt, 2017–2019
Source: MDPI journal article supplement (doi:10.3390/ani11082208), 2021-07-26
Supplement: s1 [file s1]

## Supplementary Tables and Figures

**Supplementary Table S1.** Epidemiological data and RT-qPCR<sup>a</sup> results of positive HPAI H5N8 viruses in this study. All sequenced viruses (n = 11) were found within clade 2.3.4.4b as shown in Figures 2 and 4.

| No. | Date      | Governorate     | Age/days | Bird type | Mortality% | Vaccination regime |                | RT-qPCR/Cq <sup>a</sup> |
|-----|-----------|-----------------|----------|-----------|------------|--------------------|----------------|-------------------------|
|     |           |                 |          |           |            | Frequency          | H5-clade       |                         |
| 1   | Jan. 2017 | Sharkia         | 23       | Broilers  | 12.5%      | 1X                 | 2.2.1          | 18                      |
| 2   | Jan 2017  | Qalyubia        | 18       | Broilers  | 8.5%       | 1X                 | 2.2.1          | 15                      |
| 3*  | Jan 2017  | Suez            | 26       | Broilers  | 23.5%      | 1X                 | 2.2.1          | 29                      |
| 4   | Jan 2017  | Cairo           | 34       | Broilers  | 25.33%     | 1X                 | 2.2.1          | 26                      |
| 5   | Feb 2017  | Dakahlia        | 33       | Broilers  | 19.42%     | 1X                 | 2.2.1          | 22                      |
| 6   | Feb 2017  | Ismailia        | 24       | Broilers  | 35%        | 1X                 | 2.3.2          | 22                      |
| 7   | Feb 2017  | Qena            | 26       | Broilers  | 10.42%     | 1X                 | 2.2.1          | 24                      |
| 8   | Feb 2017  | Kafer El-Sheikh | 70       | layers    | 11.2%      | 2X                 | 2.3.4          | 12                      |
| 9   | Feb 2017  | Sohag           | 31       | Broilers  | 15%        | 1X                 | 2.2.1          | 18                      |
| 10  | Mar 2017  | Sohag           | 23       | Broilers  | 19.2%      | 1X                 | 2.3.2          | 21                      |
| 11  | Mar 2017  | Sohag           | 29       | Broilers  | 15.08%     | 1X                 | 2.3.2          | 23                      |
| 12  | Mar 2017  | Luxor           | 22       | Broilers  | 17%        | non-vaccinated     | non-vaccinated | 20                      |
| 13  | Mar 2017  | Sohag           | 18       | Broilers  | 16%        | 1X                 | 2.3.2          | 16                      |
| 14  | Mar 2017  | Qalyubia        | 26       | Broilers  | 23.8%      | non-vaccinated     | non-vaccinated | 19                      |
| 15  | Mar 2017  | Sohag           | 25       | Broilers  | 16.8%      | 1X                 | 2.2.1          | 21                      |
| 16  | Mar 2017  | Aswan           | 31       | Broilers  | 28%        | non-vaccinated     | non-vaccinated | 22                      |
| 17  | Mar 2017  | Cairo           | 33       | Broilers  | 16%        | 1X                 | 2.3.2          | 29                      |
| 18  | Mar 2017  | Ismailia        | 52       | layers    | 12%        | 2X                 | 2.2.1          | 23                      |
| 19  | May 2017  | Luxor           | 32       | Broilers  | 7.8%       | 1X                 | 2.2.1          | 24                      |
| 20  | Jun 2017  | Menia           | 23       | Broilers  | 36.5%      | 1X                 | 2.2.1          | 18                      |
| 21  | Jun 2017  | Menia           | 25       | Broilers  | 12.5%      | 1X                 | 2.2.1          | 15                      |
| 22  | Jun 2017  | Menia           | 17       | Broilers  | 23.5%      | 1X                 | 2.3.2          | 30                      |
| 23  | Jul 2017  | Giza            | 115      | layers    | 11%        | 3X                 | 2.3.4          | 26                      |
| 24  | Oct 2017  | Menia           | 31       | Broilers  | 25.33%     | 1X                 | 2.2.1          | 14                      |
| 25  | Nov 2017  | Sohag           | 27       | Broilers  | 19.42%     | 1X                 | 2.2.1          | 16                      |
| 26* | Nov 2017  | Kafer El-Sheikh | 45       | layers    | 8%         | 1X                 | 2.3.4          | 24                      |
| 27  | Nov 2017  | Ismailia        | 29       | Broilers  | 31%        | 1X                 | 2.2.1          | 12                      |
| 28  | Nov 2017  | Giza            | 78       | layers    | 15%        | non-vaccinated     | non-vaccinated | 18                      |
| 29  | Dec 2017  | Qena            | 28       | Broilers  | 10.42%     | 1X                 | 2.3.2          | 21                      |
| 30* | Dec 2017  | Luxor           | 40       | layers    | 24.2%      | non-vaccinated     | non-vaccinated | 23                      |
| 31  | Dec 2017  | Qena            | 33       | Broilers  | 12.5%      | 1X                 | 2.3.2          | 20                      |
| 32* | Dec 2017  | Giza            | 25       | Broilers  | 30%        | 1X                 | 2.3.2          | 16                      |
| 33  | Dec 2017  | Menoufia        | 19       | Broilers  | 19.7%      | 1X                 | 2.2.1          | 13                      |
| 34  | Dec 2017  | Sohag           | 15       | Broilers  | 26%        | non-vaccinated     | non-vaccinated | 15                      |
| 35  | Jan 2018  | Menia           | 28       | Broilers  | 14%        | 1X                 | 2.2.1          | 18                      |

|     |          |                 |     |          |        |                |                |    |
|-----|----------|-----------------|-----|----------|--------|----------------|----------------|----|
| 36  | Jan 2018 | Suez            | 23  | Broilers | 11.2%  | 1X             | 2.2.1          | 23 |
| 37  | Jan 2018 | Wadi El-Gadid   | 112 | layers   | 7%     | 3X             | 2.2.1          | 24 |
| 38  | Jan 2018 | Sharkia         | 50  | layers   | 20%    | 2X             | 2.3.4          | 27 |
| 39  | Feb 2018 | Luxor           | 55  | layers   | 14%    | 1X             | 2.3.4          | 20 |
| 40  | Feb 2018 | Menia           | 43  | layers   | 12%    | 1X             | 2.2.1          | 21 |
| 41  | Feb 2018 | Giza            | 32  | Broilers | 33%    | non-vaccinated | non-vaccinated | 18 |
| 42* | Mar 2018 | Giza            | 123 | layer    | 6.5%   | 3X             | 2.3.4          | 22 |
| 43* | Mar 2018 | Luxor           | 20  | Broilers | 17%    | 1X             | 2.3.2          | 15 |
| 44  | Mar 2018 | Beheira         | 90  | layers   | 7%     | 2X             | 2.2.1          | 23 |
| 45  | May 2018 | Menia           | 33  | Broilers | 20%    | 1X             | 2.2.1          | 21 |
| 46  | Aug 2018 | Kafer El-Sheikh | 35  | Broilers | 30%    | non-vaccinated | non-vaccinated | 26 |
| 47  | Dec 2018 | Dakahlia        | 28  | Broilers | 9%     | 1X             | 2.2.1          | 14 |
| 48* | Dec 2018 | Qalyubia        | 35  | Broilers | 14%    | 1X             | 2.3.2          | 16 |
| 49  | Dec 2018 | Damietta        | 33  | Broilers | 11%    | 1X             | 2.2.1          | 22 |
| 50  | Jan 2019 | Gharbia         | 240 | layers   | 7.8%   | 4X             | 2.3.4          | 19 |
| 51* | Feb 2019 | Aswan           | 26  | Broilers | 16.5%  | non-vaccinated | non-vaccinated | 20 |
| 52  | Feb 2019 | Wadi El-Gadid   | 30  | Broilers | 12.5%  | 1X             | 2.2.1          | 16 |
| 53* | Feb 2019 | Sinai           | 31  | Broilers | 33.5%  | non-vaccinated | non-vaccinated | 12 |
| 54* | Feb 2019 | Qalyubia        | 275 | layers   | 9%     | 4X             | 2.3.4          | 23 |
| 55* | Mar 2019 | Dakahlia        | 60  | layers   | 2.33%  | 2X             | 2.3.4          | 18 |
| 56  | Mar 2019 | Cairo           | 165 | layers   | 19.2%  | 3X             | 2.2.1          | 12 |
| 57  | May 2019 | Damietta        | 24  | Broilers | 12.2%  | non-vaccinated | non-vaccinated | 23 |
| 58  | May 2019 | Menia           | 26  | Broilers | 15%    | 1X             | 2.2.1          | 15 |
| 59  | Jun 2019 | Sohag           | 30  | Broilers | 19.2%  | 1X             | 2.2.1          | 28 |
| 60  | Jun 2019 | Beni-Suef       | 102 | layer    | 19.08% | 2X             | 2.2.1          | 26 |
| 61  | Sep 2019 | Ismailia        | 16  | Broiler  | 13%    | 1X             | 2.3.2          | 14 |
| 62  | Sep 2019 | Dakahlia        | 115 | layer    | 11%    | 3X             | 2.3.4          | 16 |
| 63  | Oct 2019 | Aswan           | 31  | Broiler  | 43.1%  | non-vaccinated | non-vaccinated | 24 |
| 64  | Oct 2019 | Assiut          | 27  | Broiler  | 16.8%  | 1X             | 2.2.1          | 15 |
| 65  | Nov 2019 | Menia           | 145 | layer    | 9%     | 2X             | 2.2.1          | 29 |
| 66  | Nov 2019 | Qalyubia        | 29  | Broiler  | 21%    | non-vaccinated | non-vaccinated | 26 |
| 67  | Nov 2019 | Dakahlia        | 78  | layer    | 19.2%  | 1X             | 2.2.1          | 22 |
| 68  | Nov 2019 | Dakahlia        | 23  | Broiler  | 11.5%  | 1X             | 2.3.2          | 22 |
| 69  | Nov 2019 | Ismailia        | 38  | Broiler  | 18.5%  | non-vaccinated | non-vaccinated | 22 |
| 70  | Dec 2019 | Qena            | 93  | layer    | 5%     | 2X             | 2.2.1          | 13 |
| 71  | Dec 2019 | Ismailia        | 18  | Broiler  | 32.5%  | non-vaccinated | non-vaccinated | 18 |
| 72  | Dec 2019 | Fayoum          | 43  | Broiler  | 13%    | 1X             | 2.3.2          | 19 |
| 73  | Dec 2019 | Fayoum          | 30  | Broiler  | 35%    | non-vaccinated | non-vaccinated | 23 |
| 74  | Dec 2019 | Gharbia         | 60  | layer    | 16%    | non-vaccinated | non-vaccinated | 15 |

**a**=Reverse transcription quantitative Polymerase Chain Reaction (Considered positive less than 31 CT).

**X** = Times.

\*Selected samples to

be isolated

**Supplementary Table S2.** Haemagglutinin Cleavage site and accession number of HA and NA genes.

| Code no. | Designation                      | Cleavage site of HA protein | HA GenBank Accession no. | NA GenBank Accession no. |
|----------|----------------------------------|-----------------------------|--------------------------|--------------------------|
| 3        | A/chicken/Egypt/CA35/2017(H5N8)  | PLREKRRKR/GLF               | MN658687                 | MN862358                 |
| 26       | A/chicken/Egypt/CA137/2017(H5N8) | PLREKRRKR/GLF               | MN658688                 | MN862359                 |
| 48       | A/chicken/Egypt/V1410/2018(H5N8) | PLREKRRKR/GLF               | MN658693                 | MN862363                 |
| 53       | A/chicken/Egypt/S30/2019(H5N8)   | PLREKRRKR/GLF               | MN658696                 | MN862368                 |
| 54       | A/chicken/Egypt/V1748/2019(H5N8) | PLREKRRKR/GLF               | MN658697                 | MN862365                 |
| 55       | A/chicken/Egypt/F111/2019(H5N8)  | PLREKRRKR/GLF               | MN658695                 | MN862367                 |
| 30       | A/chicken/Egypt/FL34/2017(H5N8)  | PLREKRRKR/GLF               | MN658689                 | MN862360                 |
| 32       | A/chicken/Egypt/S167/2017(H5N8)  | PLREKRRKR/GLF               | MN658690                 | MN862361                 |
| 42       | A/chicken/Egypt/CA12/2018(H5N8)  | PLRERRRKR/GLF               | MN658691                 | MN862362                 |
| 43       | A/chicken/Egypt/FML2/2018(H5N8)  | PLREKRRKR/GLF               | MN658692                 | MN862364                 |
| 51       | A/chicken/Egypt/AL1/2019(H5N8)   | PIREKRRKR/GLF               | MN658694                 | MN862366                 |

no.: number

**Supplementary Table S3.** Scoring lesions of infected tissues

|                          | Day/organ | Trachea | Spleen | Cerebrum | Cecal tonsil |
|--------------------------|-----------|---------|--------|----------|--------------|
| A/duck/Egypt/SMG4/2019   | 2         | ++      | +++    | ++       | +            |
|                          | 3         | +       | +++    | ++       | +            |
|                          | 4         | +       | +++    | +        | +            |
|                          | 7         | ++      | +      | +        | ++           |
| A/chicken/Egypt/S30/2019 | 2         | ++      | +++    | ++       | +++          |
|                          | 3         | ++      | +++    | ++       | +++          |

+:mild                      ++:moderate                      +++:Severe
